# Supplementary material
Source: publisher figshare collection journal article supplement (https://acs.figshare.com/ndownloader/files/13237910)

**Supplementary Information to accompany:**

**Spatially Resolved Optical Emission and Modelling Studies of Microwave-Activated Hydrogen Plasmas Operating under Conditions Relevant for Diamond Chemical Vapor Deposition**

Edward J.D. Mahoney,<sup>1,2</sup> Benjamin S. Truscott,<sup>1,a</sup> Sohail Mushtaq,<sup>1</sup> Michael N.R. Ashfold,<sup>1</sup>  
and Yuri A. Mankelevich<sup>3</sup>

<sup>1</sup> School of Chemistry, University of Bristol, Bristol, U.K. BS8 1TS

<sup>2</sup> Centre for Doctoral Training in Diamond Science and Technology, University of Warwick,  
Gibbet Hill Road, Coventry, U.K., CV4 7AL

<sup>3</sup> Skobel'tsyn Institute of Nuclear Physics, Lomonosov Moscow State University,  
Leninskie gory, Moscow, 119991 Russia

<sup>a</sup> Present address: Element Six Global Innovation Centre, Harwell Campus, Fermi Ave, Didcot,  
U.K., OX11 0QR

**Figure S1**

(a)  $I_{\text{em}}(\lambda, z)$  Image (where  $z = 0$  defines the substrate surface) in the wavelength range 423-497 nm from a hydrogen plasma operating under base conditions:  $p = 150$  Torr,  $P = 1.5$  kW,  $F(\text{H}_2) = 300$  sccm,  $d_{\text{sub}} = 32$  mm and  $d_{\text{wire}} = 0.01$ ". The strong lines at 434.0 nm and 486.1 nm are the H Balmer- $\gamma$  and Balmer- $\beta$  emissions. (b)  $I_{\text{em}}(\lambda)$  plot of the summed emission intensities in the height range  $3 \leq z \leq 6$  mm over the wavelength range  $448 \leq \lambda \leq 465$  nm, with R branch lines of the G-B (0,0) band identified.

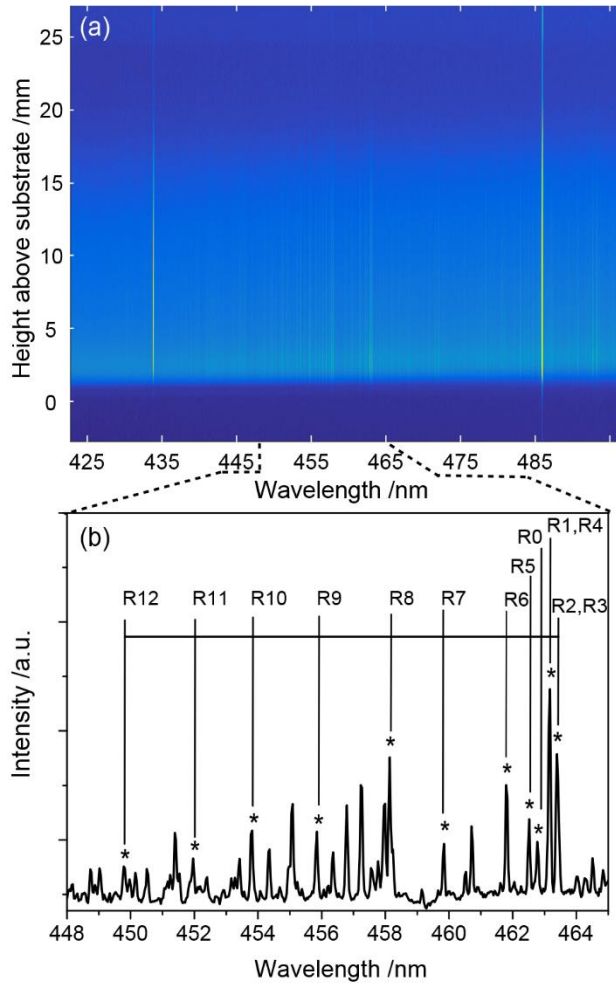

**Figure S2**

(a)  $I_{\text{em}}(\lambda, z)$  image (where  $z = 0$  defines the substrate surface) in the wavelength range 563-636 nm from a hydrogen plasma operating under base conditions:  $p = 150$  Torr,  $P = 1.5$  kW,  $F(\text{H}_2) = 300$  sccm,  $d_{\text{sub}} = 32$  mm and  $d_{\text{wire}} = 0.01$ ". (b)  $I_{\text{em}}(\lambda)$  plot of the summed emission intensities in the height range  $3 \leq z \leq 6$  mm over the range  $600 \leq \lambda \leq 620$  nm, with the utilised  $\text{H}_2$  d-a (0,0) Q branch lines identified.

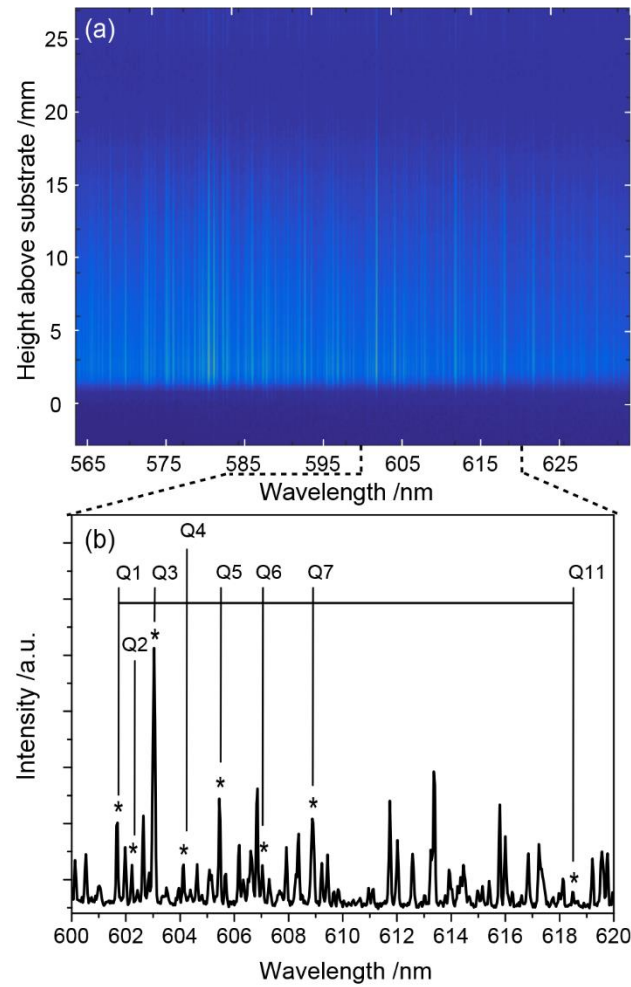

**Figure S3**

Spatial profiles of (a)  $I_{\text{em}}(\text{H}_2^*, \text{d-a})$  emission and (b)  $I_{\text{em}}(\text{H}_\alpha)$  emission for a MW activated hydrogen plasma operating at three pressures with a substrate diameter  $d_{\text{sub}} = 17 \text{ mm}$ ,  $d_{\text{wire}} = 0.004''$  and  $P = 0.9 \text{ kW}$ . The relative intensities in any given plot are displayed on a common vertical scale. Tilt view images of the plasma above the substrate (indicated by the ellipse superposed on the  $p = 275 \text{ Torr}$  image), aperture by the slot shaped viewing port, are shown in the inset in (b). The  $T_{\text{sub}}$  values at all three pressures were below our detection limit.

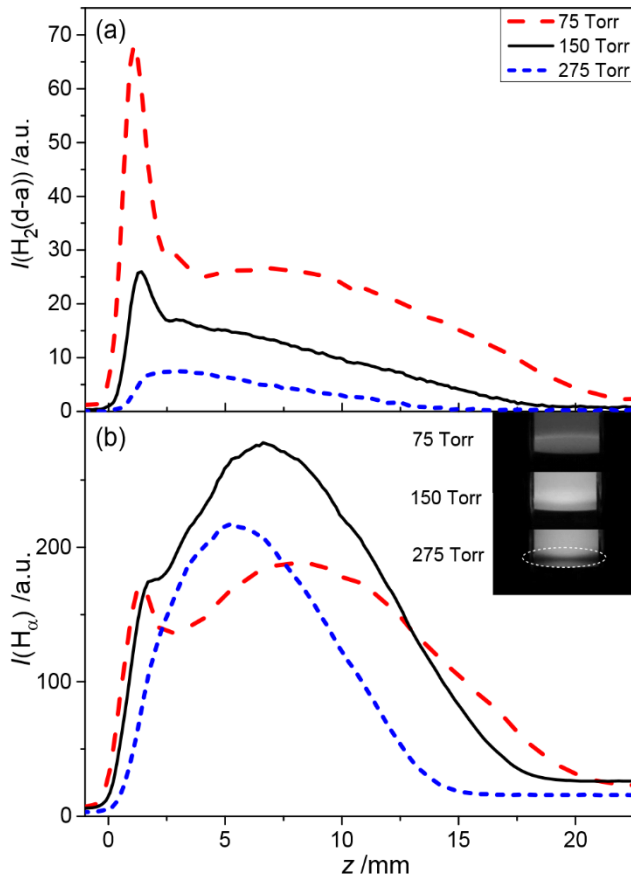

**Figure S4**

Spatial profiles of (a)  $I_{\text{em}}(\text{H}_2^*, \text{d-a})$  emission and (b)  $I_{\text{em}}(\text{H}_\alpha)$  emission from a MW activated hydrogen plasma operating at three pressures with a substrate diameter  $d_{\text{sub}} = 17$  mm,  $d_{\text{wire}} = 0.004$ ", and  $P = 1.85$  kW. The relative intensities in any given plot are displayed on a common vertical scale. The inset in (b) shows tilt view images of the plasma above the substrate, apertured by the slot shaped viewing port. The measured  $T_{\text{sub}}$  values are, respectively, below detection limit, 1020 °C and 1070 °C for  $p = 75$  Torr (red), 150 Torr (black) and 275 Torr (blue).

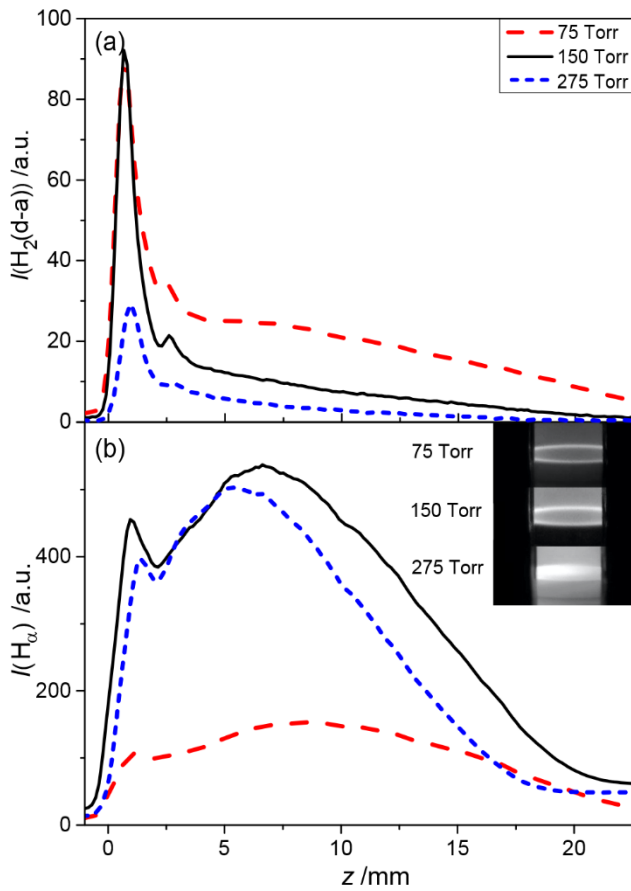

**Figure S5**

Calculated (a) axial ( $z$ ,  $r = 0$ ) and (b) radial ( $z = 10.5$  mm,  $r$ ) distributions of  $T_g$ ,  $T_e$  and  $T_{\text{tail}}$  (left hand axis) and the average absorbed MW power density  $|jE|$ , and electric  $|E|$  and reduced electric  $|E|/(N \times a)$  fields (right hand axis) for  $d_{\text{sub}} = 18$  mm and base conditions of  $p$  and  $P$ .

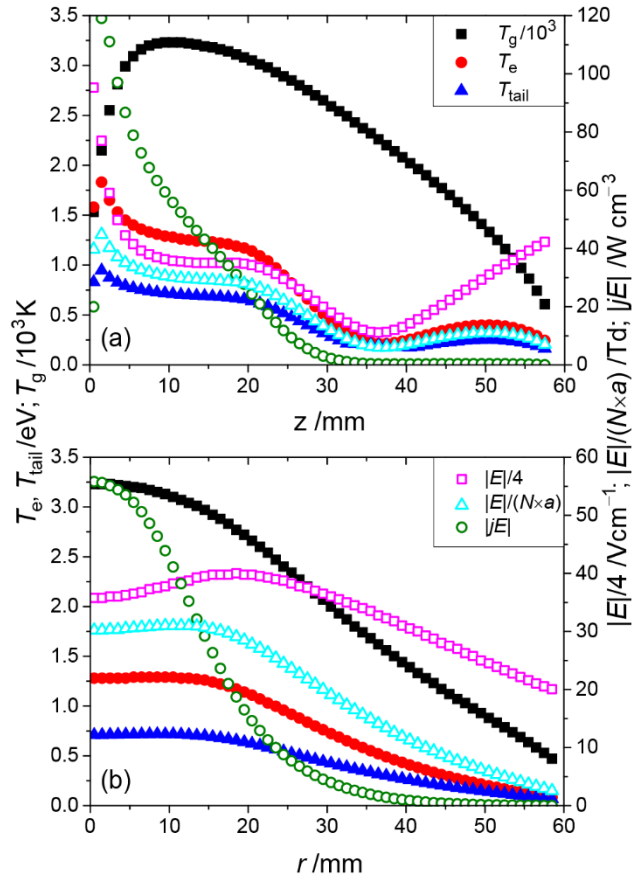

**Figure S6**

Calculated axial ( $z$ ,  $r = 0$ ) concentration distributions of (a)  $H(n = 1, 2, 3)$  atoms, (b) the dominant charged species and (c) the ground and selected excited states of  $H_2$  for  $d_{\text{sub}} = 18$  mm and base conditions of  $p$  and  $P$ . Note that the distributions in (a) and (c) are plotted on a logarithmic scale.

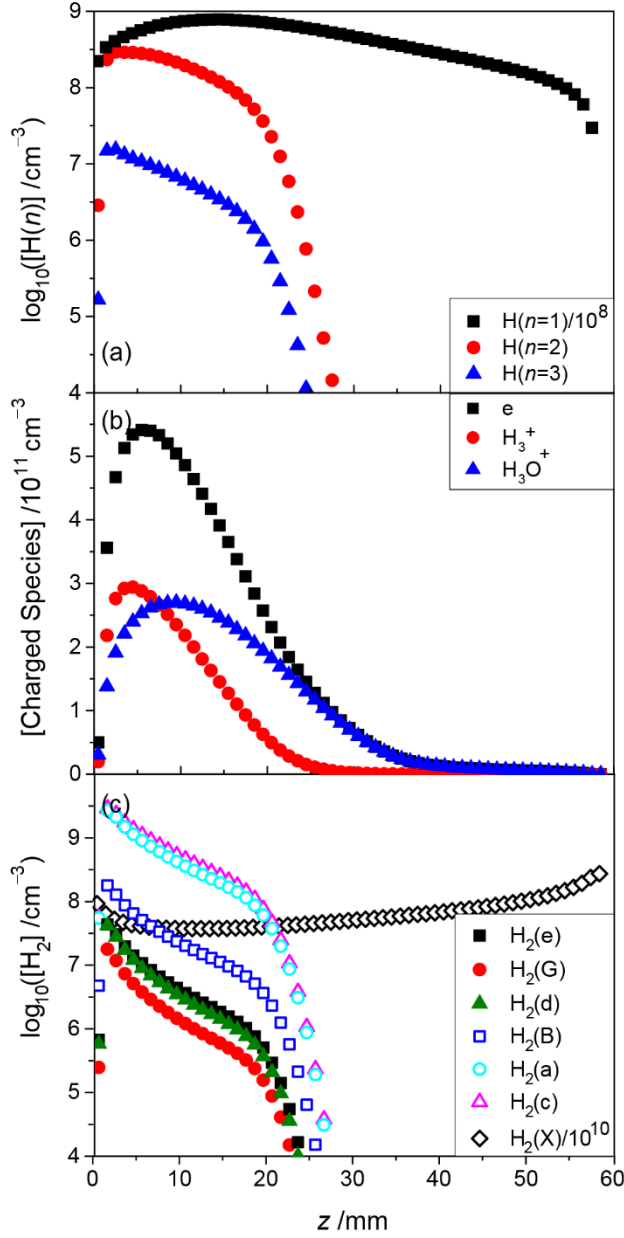

**Figure S7**

Calculated radial ( $z = 10.5$  mm,  $r$ ) concentration distributions of (a)  $H(n = 1, 2, 3)$  atoms, (b) the dominant charged species and (c) the ground and selected excited states of  $H_2$  for  $d_{\text{sub}} = 18$  mm and base conditions of  $p$  and  $P$ . Note that the distributions in (a) and (c) are plotted on a logarithmic scale.

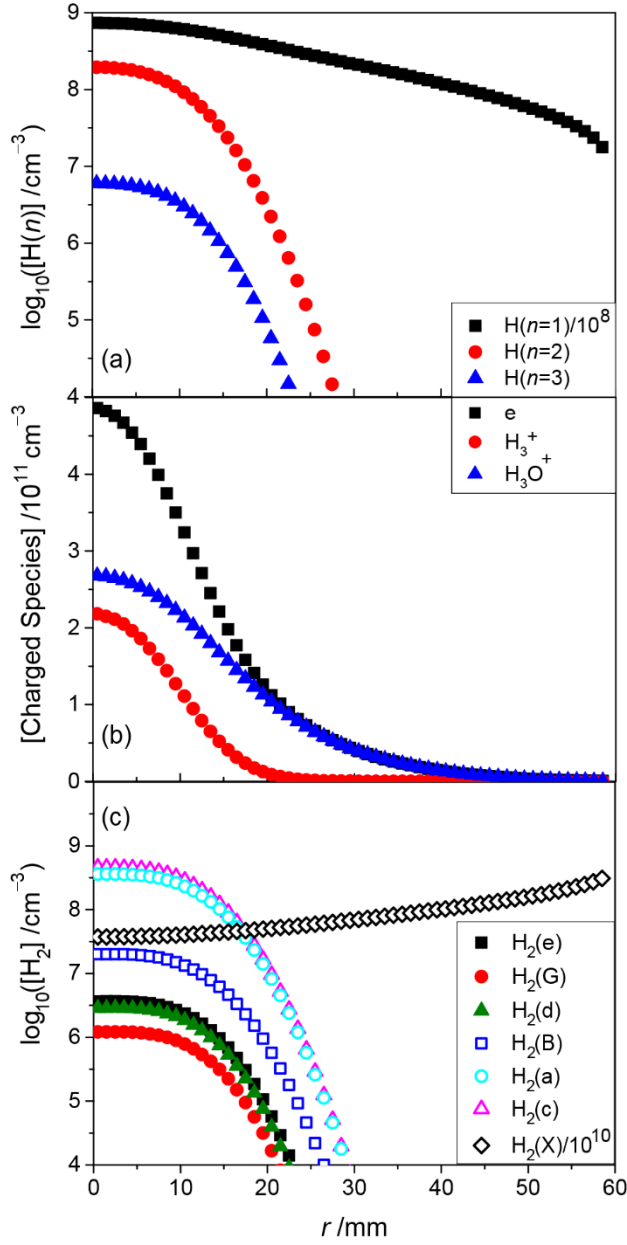



**Figure S8**

Comparisons of the calculated column densities (symbols) and measured emission intensities (lines) of (a)  $\text{H}_2(\text{G}, v=0)$  and (b)  $\text{H}_2(\text{d}, v=0)$  molecules for  $p = 75$  Torr (red), 150 Torr (black) and 250 Torr (blue), with  $P = 1.5$  kW and  $d_{\text{sub}} = 32$  mm.

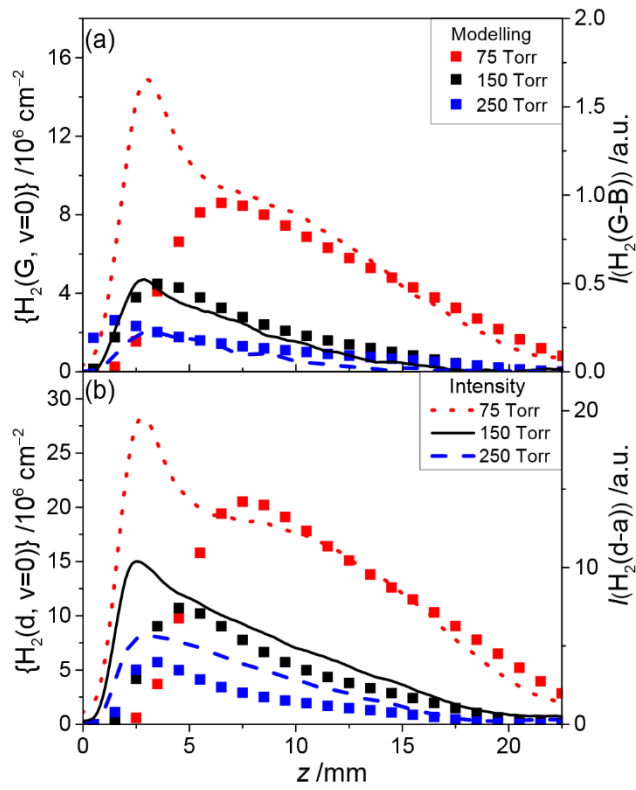

**Figure S9**

Comparisons of the calculated column densities (symbols) and measured emission intensities (lines) of (a)  $\text{H}_2(d, v=0)$  and (b)  $\text{H}(n=3)$  atoms for  $d_{\text{sub}} = 17(18)$  mm (in the experiment (in the modelling), in red) and  $d_{\text{sub}} = 32$  mm (black), with  $P = 1.5$  kW,  $p = 150$  Torr and  $d_{\text{wire}} = 0.01''$ .

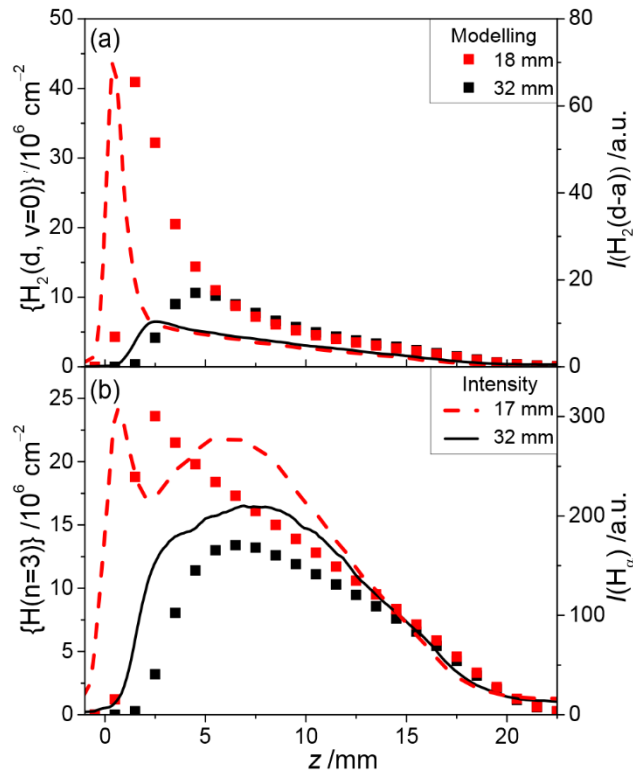

Supplement: Supplementary file 1 [file 13237910]
